# Supplementary material
Source: PubMed Central journal article supplement (PMC9761780)
Supplement: mmc1.pdf [file mmc1.pdf]

## 1 Supplementary Information

### 2 Zebrafish water preparation

3 Zebrafish water (ZW) used in the running experiment was prepared in the follow procedures.  
4 Running fresh water was passed through 1  $\mu\text{m}$  filters, UV-ray treated, supplemented with African  
5 cichlid conditioner (0.015% v/v, Nutrafin), KHBooster (0.015% v/v, Nutrafin), and Aquaplus  
6 (0.025% v/v, Nutrafin); pH 7.

7  
8 **Characteristics in CG-MS analysis to study non-polar organic chemical compounds.** The  
9 features in the analytical procedures to study volatile organic compounds in the face masks and  
10 in the water in contact with PDM and HDM fragments are recorded in the **Table S1**.

11 **Table S1. Characteristics in CG-MS analysis of organic compounds.**

| Characteristics of CG-MS                                                                 | Description                                  |
|------------------------------------------------------------------------------------------|----------------------------------------------|
| Injector temperature ( $^{\circ}\text{C}$ )                                              | 280                                          |
| Injector mode                                                                            | Splitless                                    |
| Splitless time (min)                                                                     | 1                                            |
| Column                                                                                   | HP-5MS (60 m x 0.25 mm; 0.25 $\mu\text{m}$ ) |
| Carrier                                                                                  | He                                           |
| Carrier Flow (mL/min)                                                                    | 1                                            |
| T <sup>a</sup> ramp ( $^{\circ}\text{C}/\text{min}$ , T ( $^{\circ}\text{C}$ ), t (min)) | - 60 2<br>8 310 10                           |
| Line T <sup>a</sup> transf. ( $^{\circ}\text{C}$ )                                       | 320                                          |
| Acquisition mode                                                                         | SCAN                                         |
| Time delay (min)                                                                         | 6                                            |
| SCAN range (m/Z)                                                                         | 40-500                                       |
| Adquisition time (min)                                                                   | 43.25                                        |

12

13 **Table S2. Summary of the bioinformatic results of the transcriptomic analysis**

| Sequence reads | Total reads | Trimmed reads | Reads mapped in pairs |
|----------------|-------------|---------------|-----------------------|
| Control1       | 30,475,528  | 30,475,516    | 91.16%                |
| Control 3      | 31,770,346  | 31,770,328    | 88.46%                |
| Control4       | 26,604,726  | 26,604,652    | 90.51%                |
| PDM1           | 27,833,832  | 27,833,804    | 91.04%                |
| PDM2           | 24,666,986  | 24,666,972    | 91.55%                |
| PDM3           | 26,571,964  | 26,571,948    | 90.37%                |
| HDM2           | 22,007,892  | 22,007,724    | 90.22%                |
| HDM3           | 26,712,518  | 26,712,278    | 89.83%                |
| HDM5           | 28,420,482  | 28,420,462    | 89.76%                |
| W-HDM2         | 28,690,642  | 28,690,620    | 88.25%                |
| W-HDM3         | 24,039,016  | 24,039,000    | 90.41%                |
| W-HDM4         | 24,038,746  | 24,038,690    | 89.69%                |

14

15
